# Supplementary material for: Evidence for a unitary structure of spatial cognition beyond general intelligence
Source: PubMed Central journal article supplement (PMC7331750; doi:10.1038/s41539-020-0067-8), 2020-07-02
Supplement: 41539_2020_67_MOESM1_ESM.pdf [file 41539_2020_67_MOESM1_ESM.pdf]

# Evidence for a unitary structure of spatial cognition beyond general intelligence

Margherita Malanchini, Kaili Rimfeld, Nicholas G. Shakeshaft, Andrew McMillan, Kerry L. Schofield, Maja Rodic, Valerio Rossi, Yulia Kovas, Philip S. Dale, Elliot M. Tucker-Drob, & Robert Plomin

## List of Tables

**Supplementary Table 1.** Descriptive statistics for each spatial test and  $g$ , randomly selecting one twin out of each pair

**Supplementary Table 2.** Sex differences in the six tests part of the spatial orientation battery

**Supplementary Table 3.** Univariate quantitative sex limitation models for individual tests of navigation included in the Spatial Spy battery

**Supplementary Table 4.** Confirmatory factor analysis and model fit indices across the six tests of spatial orientation

**Supplementary Table 5.** Common pathway model across the six tests of spatial orientation

**Supplementary Table 6.** Comparative model fit indices for the phenotypic models including all 16 tests of spatial skills (6 tests of spatial orientation and 10 tests of object-based spatial skills)

**Supplementary Table 7.** Hierarchical common pathway model examining the genetic and environmental factors characterizing variation in across the 16 tests of spatial abilities (6 tests of spatial orientation and 10 tests of object-based spatial skills).

**Supplementary Table 8.** Associations between the time lag of administration between the two batteries and spatial ability measures.

## List of Figures

**Supplementary Figure 1.** Two-factor model of spatial ability separating across the two spatial batteries administered at two different time points and following two different formats (online traditional psychometric assessment vs. virtual environment).

**Supplementary Figure 2.** Two-factor model of spatial ability separating objects-based and orienting tests combining putatively separate categories of tests administered across the two batteries.

**Supplementary Figure 3.** Bifactor model. This model allows for the variance common to all tests to load onto a single factor of spatial ability, while separating the variance specific to each of the two batteries

**Supplementary Figure 4.** Hierarchical model of spatial ability including two first-order factors (object manipulation and navigation/visualization) loading onto a second order general spatial ability factor

**Supplementary Figure 5.** Cholesky decomposition exploring the genetic and environmental overlap between  $g$  and the hierarchical model of spatial ability factor

**Supplementary Figure 6.** One-factor model of spatial ability including the 16 spatial tests accounting for  $g$  at the level of the indicator (each test).

**Supplementary Figure 7.** Two-factor model of spatial ability separating the two batteries accounting for  $g$  at the level of the indicators (each test).

**Supplementary Figure 8.** Two-factor model of spatial ability separating objects-based and orienting tests combining putatively different aspects of spatial skills across the two batteries accounting for  $g$  at the level of the indicators (each test).

**Supplementary Figure 9.** Three-factor model of spatial ability separating objects-based, navigation and visualization tests across the two batteries accounting for  $g$ .

**Supplementary Figure 10.** Hierarchical model including three first-order spatial factors (Navigation, Object-based and Visualization) and a second-order common factor of Spatial ability, accounting for  $g$  at the level of the indicators (each test).

**Supplementary Figure 11.** Hierarchical model including three first-order spatial factors (Navigation, Object-based and Visualization) and a second-order common factor of Spatial ability, accounting for  $g$  at the level of the first-order factors.

**Supplementary Figure 12.** Genetic and environmental variance in a measure of  $g$  at age 16 and in the common spatial ability factor.

**Supplementary Figure 13.** Correlations between all spatial tests on the other half of the sample

**Supplementary Figure 14.** Factor structure of navigation abilities conducted examining the other half of the sample

**Supplementary Figure 15.** Hierarchical model of spatial abilities conducted in the other half of the sample

## Supplementary Tables

**Supplementary Table 1.** (a) Descriptive statistics for each spatial test and developmental *g*, randomly selecting one twin out of each pair. (b) Descriptive statistics for the other half of the sample.

(a)

|                                            | N    | mean  | sd    | min    | max   | range | skew   | kurtosis |
|--------------------------------------------|------|-------|-------|--------|-------|-------|--------|----------|
| Navigation directions<br>(cardinal points) | 1330 | 0.000 | 1.000 | -3.220 | 2.440 | 5.660 | -0.170 | -0.300   |
| Navigation landmarks                       | 1278 | 0.000 | 1.000 | -4.260 | 1.980 | 6.240 | -1.140 | 1.610    |
| Map reading                                | 1244 | 0.000 | 1.000 | -4.180 | 1.620 | 5.800 | -1.020 | 1.040    |
| Route memory                               | 1217 | 0.000 | 1.000 | -4.260 | 1.510 | 5.770 | -1.350 | 1.920    |
| Large-scale perspective taking             | 1285 | 0.000 | 1.000 | -3.350 | 1.470 | 4.830 | -0.960 | 0.400    |
| Large-scale scanning                       | 1229 | 0.000 | 1.000 | -4.160 | 1.590 | 5.750 | -1.430 | 2.120    |
| KC cross-section                           | 927  | 0.000 | 1.000 | -2.200 | 2.310 | 4.510 | -0.180 | -0.760   |
| KC 2d drawing                              | 920  | 0.000 | 1.000 | -3.480 | 1.540 | 5.020 | -0.710 | -0.020   |
| KC pattern assembly                        | 896  | 0.000 | 1.000 | -2.260 | 2.620 | 4.870 | -0.370 | -0.520   |
| KC Elithorne maze                          | 804  | 0.000 | 1.000 | -3.210 | 1.990 | 5.200 | -1.160 | 1.290    |
| KC mechanical reasoning                    | 914  | 0.000 | 1.000 | -3.060 | 2.940 | 6.000 | -0.180 | -0.050   |
| KC paper folding                           | 888  | 0.000 | 1.000 | -2.290 | 2.090 | 4.390 | -0.120 | -1.000   |
| KC 3d drawing                              | 833  | 0.000 | 1.000 | -2.030 | 2.340 | 4.370 | 0.030  | -1.000   |
| KC shapes rotation                         | 850  | 0.000 | 1.000 | -2.330 | 1.870 | 4.200 | -0.340 | -0.850   |
| KC small-scale perspective<br>taking       | 859  | 0.000 | 1.000 | -1.640 | 2.980 | 4.620 | 0.610  | -0.190   |
| KC mazes                                   | 850  | 0.000 | 1.000 | -3.070 | 2.650 | 5.720 | -0.140 | -0.120   |
| General cognitive ability ( <i>g</i> )     | 1234 | 0.000 | 1.000 | -2.830 | 3.040 | 5.870 | 0.320  | 0.010    |

**Note:** all measures were standardized and residualized for age and sex within the randomly selected half of the sample by means of linear regression; KC: King's Challenge battery

(b) Descriptive statistics for the other half of the sample

|                                         | N    | mean  | sd    | min    | max   | range | skew   | kurtosis |
|-----------------------------------------|------|-------|-------|--------|-------|-------|--------|----------|
| Navigation directions (cardinal points) | 1349 | 0.000 | 1.000 | -3.250 | 2.790 | 6.050 | -0.110 | -0.330   |
| Navigation landmarks                    | 1312 | 0.000 | 1.000 | -4.330 | 2.070 | 6.400 | -0.900 | 0.870    |
| Map reading                             | 1268 | 0.000 | 1.000 | -4.300 | 1.620 | 5.930 | -1.000 | 1.160    |
| Route memory                            | 1234 | 0.000 | 1.000 | -4.500 | 1.550 | 6.050 | -1.250 | 1.710    |
| Large-scale perspective taking          | 1316 | 0.000 | 1.000 | -3.450 | 1.450 | 4.900 | -0.850 | 0.170    |
| Large-scale scanning                    | 1260 | 0.000 | 1.000 | -3.960 | 1.610 | 5.570 | -1.250 | 1.510    |
| KC cross-section                        | 939  | 0.000 | 1.000 | -2.250 | 2.330 | 4.580 | -0.260 | -0.710   |
| KC 2d drawing                           | 932  | 0.000 | 1.000 | -3.230 | 1.610 | 4.850 | -0.790 | 0.180    |
| KC pattern assembly                     | 911  | 0.000 | 1.000 | -2.420 | 2.130 | 4.550 | -0.440 | -0.580   |
| KC Elithorne maze                       | 815  | 0.000 | 1.000 | -3.850 | 1.940 | 5.790 | -1.060 | 1.280    |
| KC mechanical reasoning                 | 921  | 0.000 | 1.000 | -3.080 | 2.590 | 5.680 | -0.100 | -0.230   |
| KC paper folding                        | 893  | 0.000 | 1.000 | -2.380 | 1.900 | 4.280 | -0.270 | -0.960   |
| KC 3d drawing                           | 868  | 0.000 | 1.000 | -2.130 | 2.240 | 4.380 | -0.090 | -1.010   |
| KC shapes rotation                      | 857  | 0.000 | 1.000 | -2.450 | 1.920 | 4.370 | -0.420 | -0.760   |
| KC small-scale perspective taking       | 880  | 0.000 | 1.000 | -1.680 | 3.180 | 4.850 | 0.590  | -0.450   |
| KC mazes                                | 862  | 0.000 | 1.000 | -3.170 | 2.550 | 5.720 | -0.220 | -0.180   |
| General cognitive ability (g)           | 1242 | 0.000 | 1.000 | -2.770 | 2.950 | 5.720 | 0.150  | -0.150   |

**Note:** all measures were standardized and residualized for age and sex within the randomly selected half of the sample by means of linear regression; KC: King's Challenge battery

**Supplementary Table 2.** Sex differences in the six tests part of the spatial orientation battery

|                                         | mean F       | Mean M      | <i>F</i> (df)   | <i>t</i> ( <i>p</i> ) | <i>adj R</i> <sub>2</sub> |
|-----------------------------------------|--------------|-------------|-----------------|-----------------------|---------------------------|
| Navigation directions (cardinal points) | -0.33 (0.88) | 0.50 (0.96) | 261.0 (1, 1328) | 16.16 (<2e-16)        | 0.163                     |
| Navigation landmarks                    | -0.16 (0.83) | 0.43 (0.69) | 178.0 (1, 1276) | 13.34 (< 2e-16)       | 0.121                     |
| Map reading                             | -0.25 (0.90) | 0.50 (0.67) | 256.9 (1, 1242) | 16.02 (<2e-16)        | 0.170                     |
| Route memory                            | -0.17 (0.89) | 0.42 (0.63) | 162.6 (1, 1215) | 12.75 (< 2e-16)       | 0.117                     |
| Large-scale scanning                    | 0.00 (0.79)  | 0.25 (0.65) | 36.27 (1, 1227) | 6.023 (2.2e-09)       | 0.027                     |
| Large-scale perspective taking          | -0.13 (0.97) | 0.25 (0.89) | 49.76 (1, 1283) | 7.054 (2.8e-12)       | 0.036                     |

Note: F = females; M = males; adj = adjusted

**Supplementary Table 3a** Sex limitation model fitting sub-model comparisons (significant differences are marked in bold). HetACE= quantitative heterogeneity model; HomACE= homogeneity model (no sex differences at all); ep=estimated parameters; minus2LL= minus 2 log-likelihood; df= degrees of freedom; AIC= Akaike information criterion; diffLL= change in log-likelihood; diffdf= change in degrees of freedom (significant differences are marked in bold). (b) Univariate model fitting results for males and females separately

| <b>Total Navigation ability</b> |    |         |      |         |        |        |                  |
|---------------------------------|----|---------|------|---------|--------|--------|------------------|
|                                 | ep | -2LL    | df   | AIC     | diffLL | diffdf | p                |
| Model: HetACE                   | 8  | 5863.64 | 2122 | 1619.64 | -      | -      | -                |
| Model: HomACE                   | 5  | 5874.35 | 2125 | 1624.35 | 10.71  | 3      | <b>0.01</b>      |
| <b>Scanning</b>                 |    |         |      |         |        |        |                  |
|                                 | ep | -2LL    | df   | AIC     | diffLL | diffdf | p                |
| Model: HetACE                   | 8  | 6992.87 | 2481 | 2030.87 | -      | -      | -                |
| Model: HomACE                   | 5  | 7048.2  | 2484 | 2080.2  | 55.33  | 3      | <b>&lt; .001</b> |
| <b>Perspective taking</b>       |    |         |      |         |        |        |                  |
|                                 | ep | -2LL    | df   | AIC     | diffLL | diffdf | p                |
| Model: HetACE                   | 8  | 7314.77 | 2593 | 2128.77 | -      | -      | -                |
| Model: HomACE                   | 5  | 7328.79 | 2596 | 2136.79 | 14.02  | 3      | <b>&lt; .001</b> |
| <b>Navigation landmarks</b>     |    |         |      |         |        |        |                  |
| Quantitative differences:       |    |         |      |         |        |        |                  |
|                                 | ep | -2LL    | df   | AIC     | diffLL | diffdf | p                |
| Model: HetACE                   | 8  | 7216.09 | 2582 | 2052.09 | -      | -      | -                |
| Model: HomACE                   | 5  | 7248.5  | 2585 | 2078.5  | 32.42  | 3      | <b>&lt; .001</b> |
| <b>Navigation directions</b>    |    |         |      |         |        |        |                  |

Quantitative differences:

|               | ep | -2LL    | df   | AIC     | diffLL | diffdf | p    |
|---------------|----|---------|------|---------|--------|--------|------|
| Model: HetACE | 8  | 7392.27 | 2671 | 2050.27 | -      | -      | -    |
| Model: HomACE | 5  | 7398.39 | 2674 | 2050.39 | 6.12   | 3      | 0.11 |

---

**Map reading**

---

|               | ep | -2LL    | df   | AIC     | diffLL | diffdf | p      |
|---------------|----|---------|------|---------|--------|--------|--------|
| Model: HetACE | 8  | 6983.5  | 2504 | 1975.5  | -      | -      | -      |
| Model: HomACE | 5  | 7079.69 | 2507 | 2065.69 | 96.19  | 3      | < .001 |

---

**Route memory**

---

|               | ep | -2LL    | df   | AIC     | diffLL | diffdf | p      |
|---------------|----|---------|------|---------|--------|--------|--------|
| Model: HetACE | 8  | 6769.48 | 2443 | 1883.48 | -      | -      | -      |
| Model: HomACE | 5  | 6894.1  | 2446 | 2002.1  | 124.63 | 3      | < .001 |

---

**Supplementary Table 3b** Heritability (A), shared environmental (C) and nonshared environmental (E) estimates for each test calculated separately for females and males. Numbers in parentheses are 95% confidence intervals

|                       | <b>A</b>         | <b>C</b>         | <b>E</b>         |
|-----------------------|------------------|------------------|------------------|
| <b>Females</b>        |                  |                  |                  |
| Navigation ability    | 0.53 (0.29-0.61) | 0 (0.01-0.19)    | 0.47 (0.38-0.56) |
| Scanning              | 0.14 (0.01-0.26) | 0 (0.01-0.14)    | 0.86 (0.74-0.99) |
| Perspective taking    | 0.33 (0.01-0.43) | 0.01 (0.01-0.25) | 0.66 (0.57-0.78) |
| Navigation landmarks  | 0.35 (0.04-0.53) | 0.09 (0.01-0.33) | 0.56 (0.46-0.67) |
| Navigation directions | 0.46 (0.21-0.62) | 0.08 (0.01-0.28) | 0.46 (0.37-0.54) |
| Map reading           | 0.27 (0.01-0.37) | 0 (0.01-0.23)    | 0.73 (0.62-0.85) |
| Route memory          | 0.26 (0.01-0.36) | 0 (0.01-0.25)    | 0.74 (0.64-0.86) |
| <b>Males</b>          |                  |                  |                  |
| Navigation ability    | 0.59 (0.39-0.69) | 0 (0.01-0.15)    | 0.40 (0.31-0.52) |
| Scanning              | 0.01 (0.01-0.30) | 0.13 (0.01-0.25) | 0.86 (0.71-0.99) |
| Perspective taking    | 0.22 (0.01-0.36) | 0 (0.01-0.10)    | 0.78 (0.63-0.99) |
| Navigation landmarks  | 0.09 (0.01-0.45) | 0.25 (0.35-0.40) | 0.66 (0.51-0.78) |
| Navigation directions | 0.63 (0.42-0.71) | 0 (0.01-0.17)    | 0.37 (0.29-0.46) |
| Map reading           | 0.63 (0.47-0.73) | 0 (0.01-0.08)    | 0.37 (0.26-0.51) |
| Route memory          | 0.53 (0.28-0.63) | 0 (0.01-0.16)    | 0.47 (0.37-0.60) |



**Supplementary Table 4.** Confirmatory factor analysis and model fit indices across the six tests of spatial orientation.

| <b>Spatial orientation battery</b>                                                                           | <b>Factor loadings</b> | <b>S.E.</b> |
|--------------------------------------------------------------------------------------------------------------|------------------------|-------------|
| Navigation directions (cardinal points)                                                                      | 0.736                  | 0.017       |
| Navigation landmarks                                                                                         | 0.756                  | 0.017       |
| Map reading                                                                                                  | 0.682                  | 0.019       |
| Route memory                                                                                                 | 0.636                  | 0.021       |
| Large-scale perspective taking                                                                               | 0.582                  | 0.022       |
| Large-scale scanning                                                                                         | 0.566                  | 0.024       |
| Model fit indices: $\chi^2 = 69.051(9)$ , $p < .00005$ , CFI = 0.972 TLI = 0.953, RMSEA = 0.071 SRMR. =0.026 |                        |             |

Note: CFI = comparative fit index; TLI = Tucker-Lewis index; RMSEA = root mean square error of approximation, SRMR = standardized root mean square residual

**Supplementary Table 5.** Common pathway model examining the common and specific genetic (A), shared-environmental (C) and nonshared environmental variance (E) across the six tests of spatial orientation and model fit indices.

| <b>Variance specific to each test</b>   |                       |                        |                      | <b>Percentages of A, C and E variance in each test captured by the common Navigation factor</b> |          |          |
|-----------------------------------------|-----------------------|------------------------|----------------------|-------------------------------------------------------------------------------------------------|----------|----------|
| <b>Measure</b>                          | <b>A</b>              | <b>C</b>               | <b>E</b>             | <b>A</b>                                                                                        | <b>C</b> | <b>E</b> |
| Navigation directions                   | 0.181 (0.136; 0.233)  | 0.001 (-0.000; 0.001)  | 0.274 (0.228; 0.324) | 66%                                                                                             | 100%     | 36%      |
| Navigation landmarks                    | 0.000 (-0.001, 0.001) | 0.038 (0.006; 0.096)   | 0.394 (0.340; 0.451) | 88%                                                                                             | 53%      | 28%      |
| Map reading                             | 0.035 (0.000; 0.130)  | 0.000 (-0.000; 0.000)  | 0.506 (0.431; 0.586) | 88%                                                                                             | 100%     | 20%      |
| Route memory                            | 0.058 (0.005; 0.167)  | 0.001 (-0.078; 0.099)  | 0.564 (0.478; 0.654) | 80%                                                                                             | 100%     | 16%      |
| Large-scale scanning                    | 0.000 (-0.001; 0.002) | -0.000 (-0.000; 0.000) | 0.705 (0.664; 0.748) | 100%                                                                                            | 100%     | 10%      |
| Large-scale perspective-taking          | 0.047 (0.003; 0.139)  | 0.000 (0.000; 0.000)   | 0.597(0.524; 0.675)  | 82%                                                                                             | 100%     | 15%      |
| <b>Variance common across all tests</b> |                       |                        |                      |                                                                                                 |          |          |
| Navigation latent factor                | 0.634 (0.410; 0.912)  | 0.083 (-0.005; 0.430)  | 0.278 (0.206; 0.362) |                                                                                                 |          |          |

Model fit indices: AIC = 39177.976;  $\chi^2 = 269.937 (148)$ ,  $p = 0.0000$ ; CFI = 0.968; TLI = 0.971; RMSEA = 0.030 ; SRMR = 0.049

**Note.** All paths are standardized and squared, numbers in parentheses are 95% confidence intervals around the estimates; CFI = comparative fit index; TLI = Tucker-Lewis index; RMSEA = root mean square error of approximation, SRMR = standardized root mean square residual

**Supplementary Table 6a.** Comparative model fit indices for the phenotypic models including all 16 tests of spatial skills (6 tests of spatial orientation and 10 tests of object-based spatial skills)

|   | Model                                                                                                         | CFI   | TLI   | RMSEA | Chi <sup>2</sup>           | AIC       | Akaike weights | SRMR  | Correlations between latent factors                           |
|---|---------------------------------------------------------------------------------------------------------------|-------|-------|-------|----------------------------|-----------|----------------|-------|---------------------------------------------------------------|
| a | 1 Factor                                                                                                      | 0.890 | 0.873 | 0.061 | 692.730 (104),<br>p < .001 | 41594.511 | 0.00           | 0.059 | -                                                             |
| b | 2 Factors (Spatial Spy battery and King's Challenge battery)                                                  | 0.958 | 0.951 | 0.037 | 316.000 (103),<br>p < .001 | 41232.958 | -              | 0.040 | .741                                                          |
| c | 2 Factors (Object Manipulation and Spatial Orientation)                                                       | 0.920 | 0.907 | 0.053 | 529.390 (103),<br>p < .001 | 41433.108 | 0.00           | 0.054 | .847                                                          |
| d | Bifactor Model (Spatial Spy battery, King's Challenge battery and spatial ability)                            | 0.822 | 0.770 | 0.083 | 5471.714(120), p < .001    | 41970.898 | 0.00           | 0.196 | -                                                             |
| e | 3 Factors (Object Manipulation Navigation and Visualization)                                                  | 0.953 | 0.944 | 0.041 | 351.870 (101),<br>p < .001 | 41259.589 | 0.50*          | 0.041 | Obj with Or = .726<br>Or with Sc = .948<br>Sc with Obj = .858 |
| f | 3 Factors (Object Manipulation Navigation and Visualization) and a second order common Spatial Ability factor | 0.953 | 0.944 | 0.041 | 351.870 (101),<br>p < .001 | 41259.589 | 0.50*          | 0.041 | -                                                             |
| g | 2 Factors (Object Manipulation and Navigation/Visualization) and a second order common Spatial Ability factor | 0.729 | 0.697 | 0.095 | 1554.839(107),<br>p < .001 | 42450.558 | 0.00           | 0.297 | -                                                             |

Note: Akaike weights were calculated using the 'Weights' function of the R package MuMIn (Bartoń, 2019); Model b was not included in the calculation of the Akaike weights as the interpretation of the model is problematic since the two separate factors that emerge may be a product of differences in the two test batteries and the modality of assessment rather than reflecting real clustering of separate overarching abilities. \* = these two models are equivalent. Model c specifies a bifactor model; however, in this case this model could also be described as a multi-trait-multi-method (MTMM) approach because, as shown in Figure S3, the two separate test-based factors could reflect specific assessment method variance. CFI = comparative fit index; TLI = Tucker-Lewis index; RMSEA = root mean square error of approximation, SRMR = standardized root mean square residual; AIC = Akaike Information criterion.

**Supplementary Table 6b.** Comparative model fit indices for the phenotypic models including all 16 tests of spatial skills (6 tests of spatial orientation and 10 tests of object-based spatial skills) including general cognitive ability (*g*) as a correlate to the model.

|   | Model                                                                                                                                             | CFI   | TLI   | RMSEA | Chi <sup>2</sup>           | AIC       | Akaike Weights | SRMR  | Correlations between latent factors                           |
|---|---------------------------------------------------------------------------------------------------------------------------------------------------|-------|-------|-------|----------------------------|-----------|----------------|-------|---------------------------------------------------------------|
| h | 1 Factor <i>accounting for g<sub>1</sub></i>                                                                                                      | 0.894 | 0.862 | 0.067 | 609.795 (104),<br>p < .001 | 33880.185 | 0.00           | 0.053 | -                                                             |
| i | 2 Factors (Spatial Spy battery and King's Challenge battery) <i>accounting for g<sub>1</sub></i>                                                  | 0.961 | 0.949 | 0.041 | 288.468 (103),<br>p < .001 | 33560.857 | -              | 0.038 | .659                                                          |
| j | 2 Factors (Object Manipulation and Spatial Orientation) <i>accounting for g<sub>1</sub></i>                                                       | 0.925 | 0.901 | 0.057 | 461.763 (103),<br>p < .001 | 33734.153 | 0.00           | 0.051 | .775                                                          |
| k | 3 Factors (Object Manipulation Navigation and Visualization) <i>accounting for g<sub>1</sub></i>                                                  | 0.957 | 0.942 | 0.043 | 306.307 (101),<br>p < .001 | 33582.697 | 0.50*          | 0.038 | Obj with Or = .633<br>Or with Sc = .949<br>Sc with Obj = .806 |
| l | 3 Factors (Object Manipulation Navigation and Visualization) and a second order common Spatial Ability factor <i>accounting for g<sub>1</sub></i> | 0.957 | 0.942 | 0.043 | 306.307 (101),<br>p < .001 | 33582.697 | 0.50*          | 0.038 | -                                                             |
| m | 3 Factors (Object Manipulation Navigation and Visualization) and a second order common Spatial Ability factor <i>accounting for g<sub>2</sub></i> | 0.951 | 0.941 | 0.044 | 348.789 (114),<br>p < .001 | 33599.178 | 0.00           | 0.041 | -                                                             |

Note: Akaike weights were calculated using the 'Weights' function of the R package MuMIn (Bartoń, 2019). Model g was not included in the calculation of the Akaike weights as the interpretation of the model is problematic since the two separate factors that emerge may be a product of differences in the two test batteries and the modality of assessment rather than reflecting real clustering of separate overarching abilities. \* = these two models are equivalent. <sub>1</sub> = general cognitive ability (*g*) included in the model at the level of the indicators; <sub>2</sub> = *g* included in the model at the level of the first order latent factors. Models i and j and models i and are k represent two different ways of specifying the same model, therefore their model fit indices are identical. CFI = comparative fit index; TLI = Tucker-Lewis index; RMSEA = root mean square error of approximation, SRMR = standardized root mean square residual; AIC = Akaike Information criterion.

**Supplementary Table 7.** Genetic and environmental variance components for the hierarchical model of spatial abilities

| Measure                                      | Variance specific to each test |                      | Loading on first order factor  | A and E variance captured by the first order factors but not shared with the general spatial ability factor |       |
|----------------------------------------------|--------------------------------|----------------------|--------------------------------|-------------------------------------------------------------------------------------------------------------|-------|
|                                              | A                              | E                    |                                | A                                                                                                           | E     |
| Navigation from directions (cardinal points) | 0.136 (0.094; 0.186)           | 0.255 (0.214; 0.309) | 0.777 (0.755; 0.799)           | 0.030                                                                                                       | 0.048 |
| Navigation from landmarks                    | 0.072 (0.025; 0.145)           | 0.419 (0.356; 0.487) | 0.712 (0.685; 0.740)           | 0.025                                                                                                       | 0.041 |
| Map reading                                  | 0.016; (-0.016; 0.133)         | 0.511 (0.438; 0.588) | 0.687 (0.658; 0.717)           | 0.023                                                                                                       | 0.036 |
| Route memory                                 | 0.059 (0.007; 0.160)           | 0.565 (0.483; 0.654) | 0.612 (0.577; 0.647)           | 0.018                                                                                                       | 0.029 |
| Cross-sections                               | 0.075 (0.024; 0.155)           | 0.556 (0.491; 0.625) | 0.606 (0.573; 0.639)           | 0.100                                                                                                       | 0.029 |
| 2D drawing                                   | 0.010 (-0.046; 0.173)          | 0.470 (0.398; 0.549) | 0.721 (0.694; 0.748)           | 0.139                                                                                                       | 0.041 |
| Pattern assembly                             | 0.028 (-0.000; 0.128)          | 0.527 (0.456; 0.602) | 0.666 (0.637; 0.696)           | 0.100                                                                                                       | 0.029 |
| Shapes rotation                              | 0.051 (0.009; 0.125)           | 0.476 (0.412; 0.543) | 0.688 (0.658; 0.718)           | 0.128                                                                                                       | 0.036 |
| Mechanical reasoning                         | 0.150 (0.093; 0.221)           | 0.473 (0.405; 0.546) | 0.614; (0.579; 0.648)          | 0.100                                                                                                       | 0.029 |
| Paper folding                                | 0.107 (0.059; 0.169)           | 0.366 (0.302; 0.429) | 0.726 (0.698; 0.754)           | 0.143                                                                                                       | 0.042 |
| 3D drawing                                   | 0.093 (0.046; 0.155)           | 0.303 (0.250; 0.362) | 0.777 (0.752; 0.801)           | 0.160                                                                                                       | 0.047 |
| Small-scale perspective taking               | 0.154 (0.081; 0.250)           | 0.602 (0.512; 0.697) | 0.494 (0.453; 0.535)           | 0.000                                                                                                       | 0.000 |
| Large-scale scanning                         | 0.000 (-0.001; 0.002)          | 0.741 (0.698; 0.783) | 0.509 (0.468; 0.550)           | 0.000                                                                                                       | 0.000 |
| Large-scale perspective-taking               | 0.024 (-0.000; 0.136)          | 0.608 (0.538; 0.688) | 0.604 (0.571; 0.636)           | 0.000                                                                                                       | 0.000 |
| Elithorne Mazes                              | 0.176 (0.096; 0.284)           | 0.532 (0.438; 0.636) | 0.537 (0.486; 0.604)           | 0.000                                                                                                       | 0.000 |
| Mazes                                        | 0.134 (0.067; 0.223)           | 0.577 (0.497; 0.664) | 0.537 (0.495; 0.579)           | 0.000                                                                                                       | 0.000 |
| Variance captured by the first order factors |                                |                      | Loading on second order factor | A and E variance captured by the general spatial ability factor                                             |       |

|                                                                                         |                      |                      |                      |       |       |
|-----------------------------------------------------------------------------------------|----------------------|----------------------|----------------------|-------|-------|
| Navigation latent factor                                                                | 0.051 (0.011; 0.122) | 0.085 (0.041; 0.145) | 0.929 (0.904; 0.954) | 0.726 | 0.138 |
| Object-based latent factor                                                              | 0.265 (0.198; 0.339) | 0.075 (0.028; 0.145) | 0.812 (0.776; 0.848) | 0.551 | 0.104 |
| Visualization latent factor                                                             | 0.000 (0.000; 0.000) | 0.000 (0.000; 0.000) | 1.00 (1.00; 1.000)   | 0.837 | 0.163 |
| <b>Variance common to all tests captured by the second order Spatial Ability factor</b> |                      |                      |                      |       |       |
| <b>Common factor of Spatial ability</b>                                                 | 0.837 (0.779; 0.894) | 0.163 (0.110; 0.225) | -                    | -     | -     |

Model fit indices: AIC = 82828.772;  $\chi^2 = 1681.128$  (1040),  $p = 0.0000$ ; CFI = 0.941; TLI = 0.944; RMSEA = 0.026 ; SRMR = 0.056

*Note:* CFI = comparative fit index; TLI = Tucker-Lewis index; RMSEA = root mean square error of approximation, SRMR = standardized root mean square residual; AIC = Akaike Information criterion.

**Supplementary Table 8.** Associations between the time lag of administration between the two batteries and spatial ability measures.

| <i>Measure</i>                   | <i>r</i> | <i>p</i> | <i>N</i> |
|----------------------------------|----------|----------|----------|
| Navigation directions            | 0.015    | 0.524    | 1,752    |
| Navigation landmark              | 0.024    | 0.321    | 1,733    |
| Map reading                      | 0.004    | 0.875    | 1,702    |
| Route memorizing                 | -0.003   | 0.914    | 1,681    |
| Perspective taking (large scale) | 0.050    | 0.036    | 0.036    |
| Scanning (large scale)           | 0.010    | 0.689    | 1,696    |
| Cross-section                    | 0.026    | 0.274    | 1,828    |
| 2D drawing                       | 0.065    | 0.006    | 1,831    |
| Pattern assembly                 | 0.063    | 0.008    | 1,761    |
| Shapes rotation                  | 0.009    | 0.733    | 1,621    |
| Mechanical reasoning             | 0.025    | 0.283    | 1,800    |
| Paper folding                    | 0.039    | 0.103    | 1,746    |
| 3D drawing                       | 0.044    | 0.074    | 1,665    |
| Perspective taking               | 0.036    | 0.142    | 1,711    |
| Elithorn maze                    | 0.035    | 0.152    | 1,683    |
| Mazes                            | 0.008    | 0.730    | 1,692    |

## Supplementary Figures

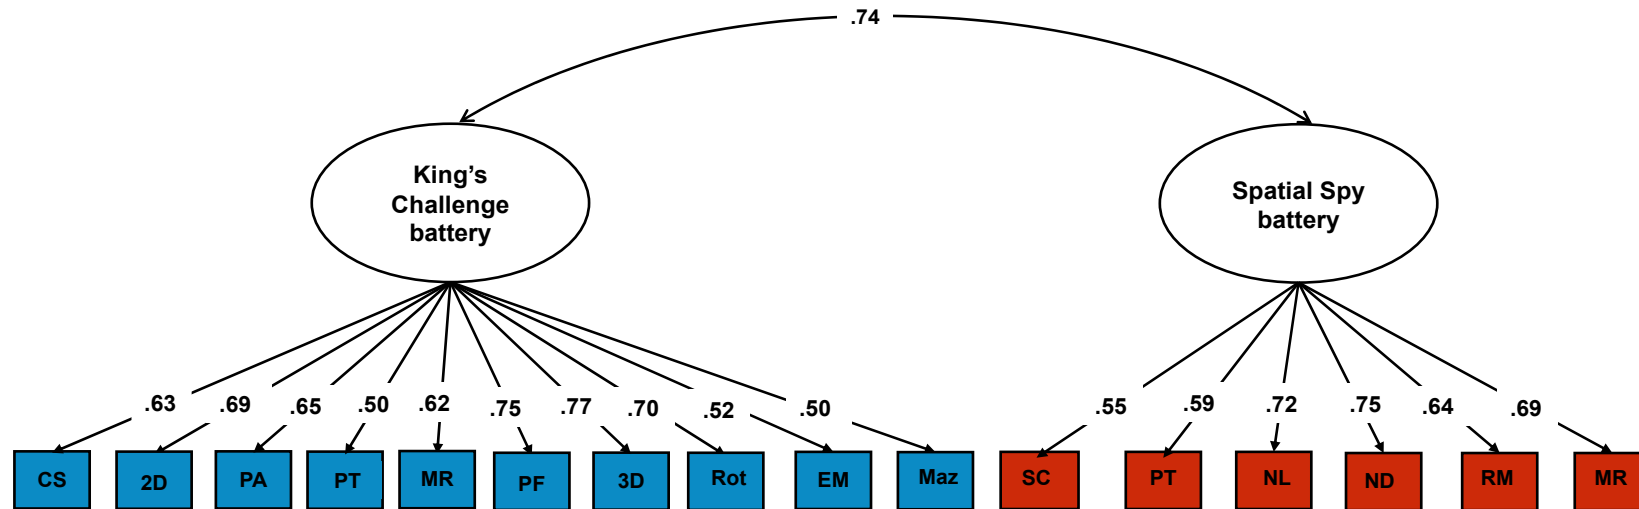

**Supplementary Figure 1.** Two-factor model of spatial ability separating across the two spatial batteries administered at two different time points and following two different formats (online traditional psychometric assessment – The King’s Challenge battery – vs. virtual environment – The Spatial Spy battery). ND = navigation based on directions, NL = navigation based on landmarks, MR = map reading, RM = route memory, PT = perspective taking, SC = scanning, CS = cross-section, 2d = 2d drawing, PA = pattern assembly, EM = Elithorn Mazes, MR = Mechanical Reasoning, PF = paper folding, 3d = 3d drawing, Rot = mental rotation, PT = perspective taking, Maz = mazes; Model fit indices are reported in Table S6.



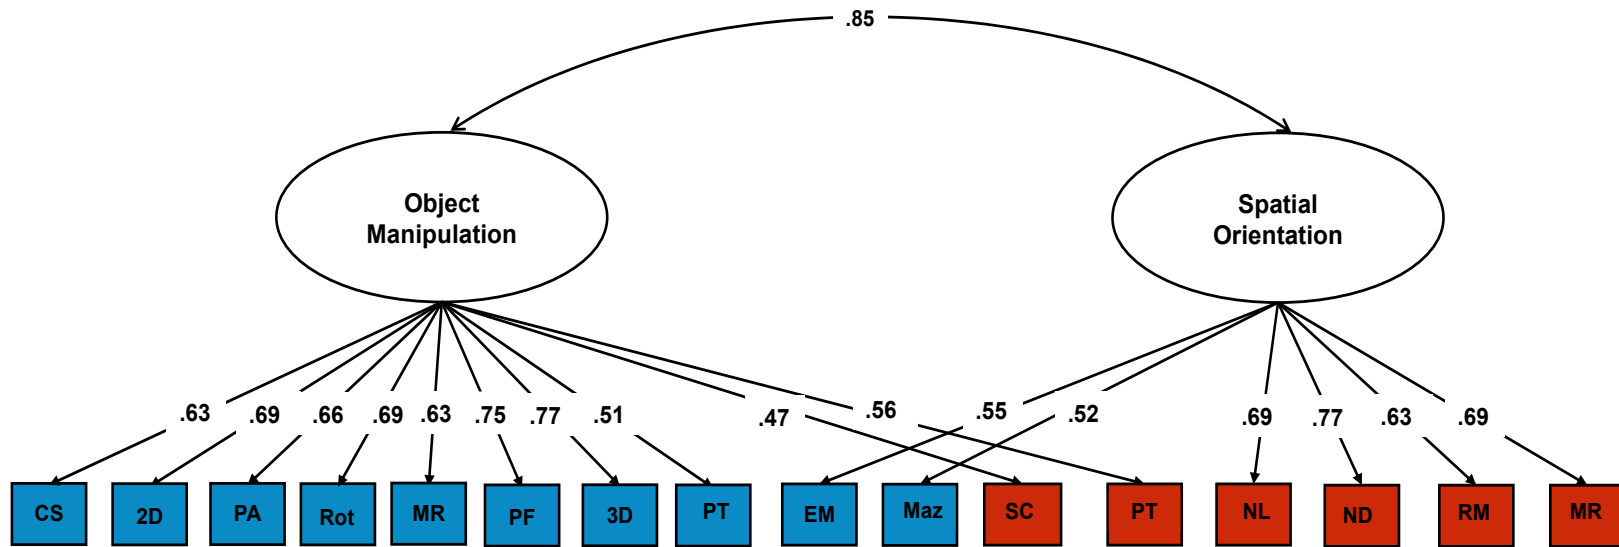

**Supplementary Figure 2.** Two-factor model of spatial ability separating objects-based and orienting tests combining putatively separate categories of tests administered across the two batteries. ND = navigation based on directions, NL = navigation based on landmarks, MR = map reading, RM = route memory, PT = perspective taking, SC = scanning, CS = cross-sections, 2d = 2d drawing, PA = pattern assembly, EM = Elithorn Mazes, MR = Mechanical Reasoning, PF = paper folding, 3d = 3d drawing, Rot = mental rotation, PT = perspective taking, Maz = mazes; Model fit indices are reported in Table S5.

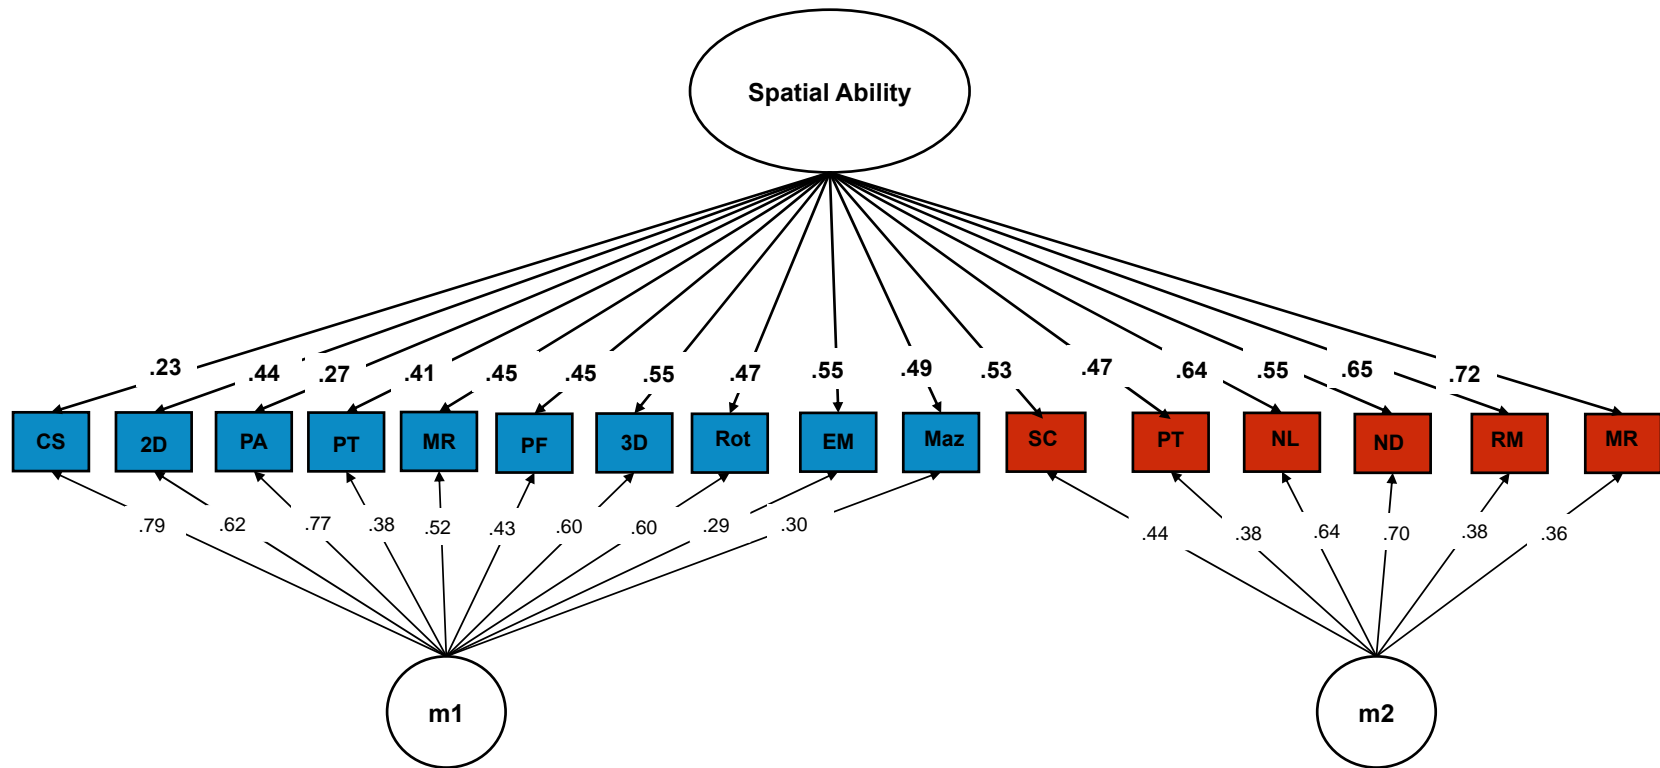

**Supplementary Figure 3.** Bifactor model. This model allows for the variance common to all tests to load onto a single factor of spatial ability, while separating the variance specific to each of the two batteries (m1 = online traditional psychometric assessment – The King’s Challenge battery – vs. m2 = virtual environment – The Spatial Spy battery). The battery-specific variance might reflect a combination of specific ability as well as methodological differences between the two batteries. For this reason, this bifactor model might also be described as a Multi-Trait Multi-Method model. ND = navigation based on directions, NL = navigation based on landmarks, MR = map reading, RM = route memory, PT = perspective taking, SC = scanning, CS = cross-section, 2d = 2d drawing, PA = pattern assembly, EM = Elithorn Mazes, MR = Mechanical Reasoning, PF = paper folding, 3d = 3d drawing, Rot = mental rotation, PT = perspective taking, Maz = mazes; Model fit indices are reported in Table S6.

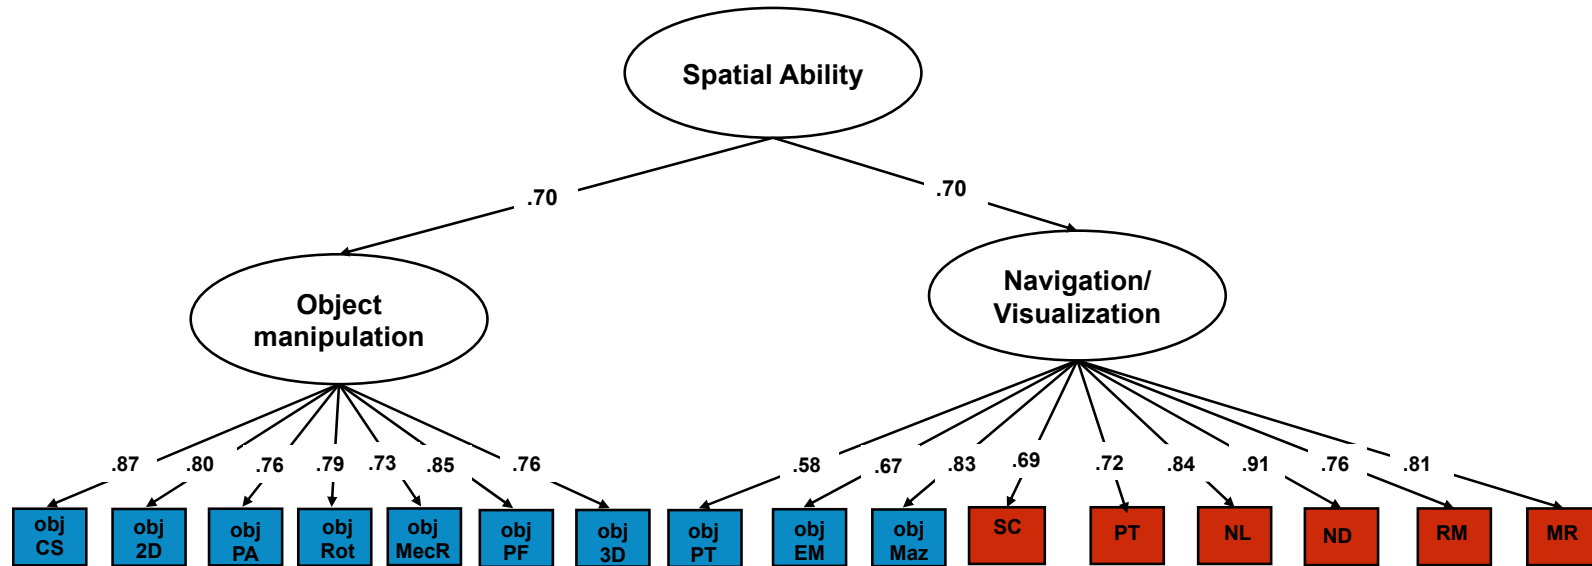

**Supplementary Figure 4.** Hierarchical model of spatial ability including two first-order factors (object manipulation and navigation/visualization) loading onto a second order general spatial ability factor. ND = navigation based on directions, NL = navigation based on landmarks, MR = map reading, RM = route memory, PT = perspective taking, SC = scanning, CS = cross-section, 2d = 2d drawing, PA = pattern assembly, EM = Elithorn Mazes, MR = Mechanical Reasoning, PF = paper folding, 3d = 3d drawing, Rot = mental rotation, PT = perspective taking, Maz = mazes; Model fit indices are reported in Table S6.

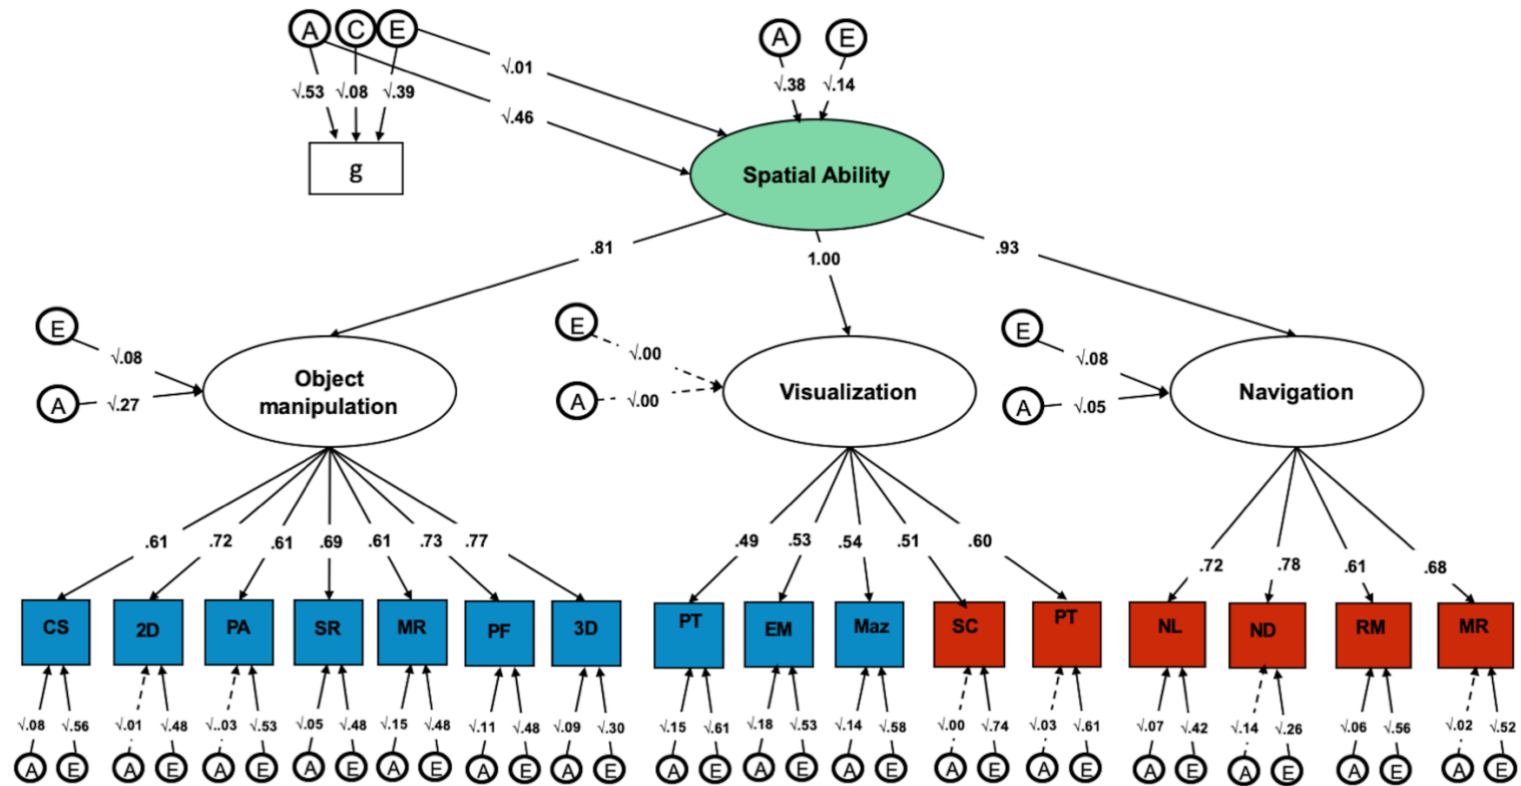

**Supplementary Figure 5.** Hierarchical common pathway model exploring the genetic and environmental association between *g* and the common spatial ability factor. ND = navigation based on directions, NL = navigation based on landmarks, MR = map reading, RM = route memory, PT = perspective taking, SC = scanning, CS = cross-sections, 2d = 2d drawing, PA = pattern assembly, EM = Elithorn Mazes, MR = Mechanical Reasoning, PF = paper folding, 3d = 3d drawing, Rot = mental rotation, PT = perspective taking, Maz = mazes, *g* = general cognitive ability; Model fit indices are reported in Table S6.

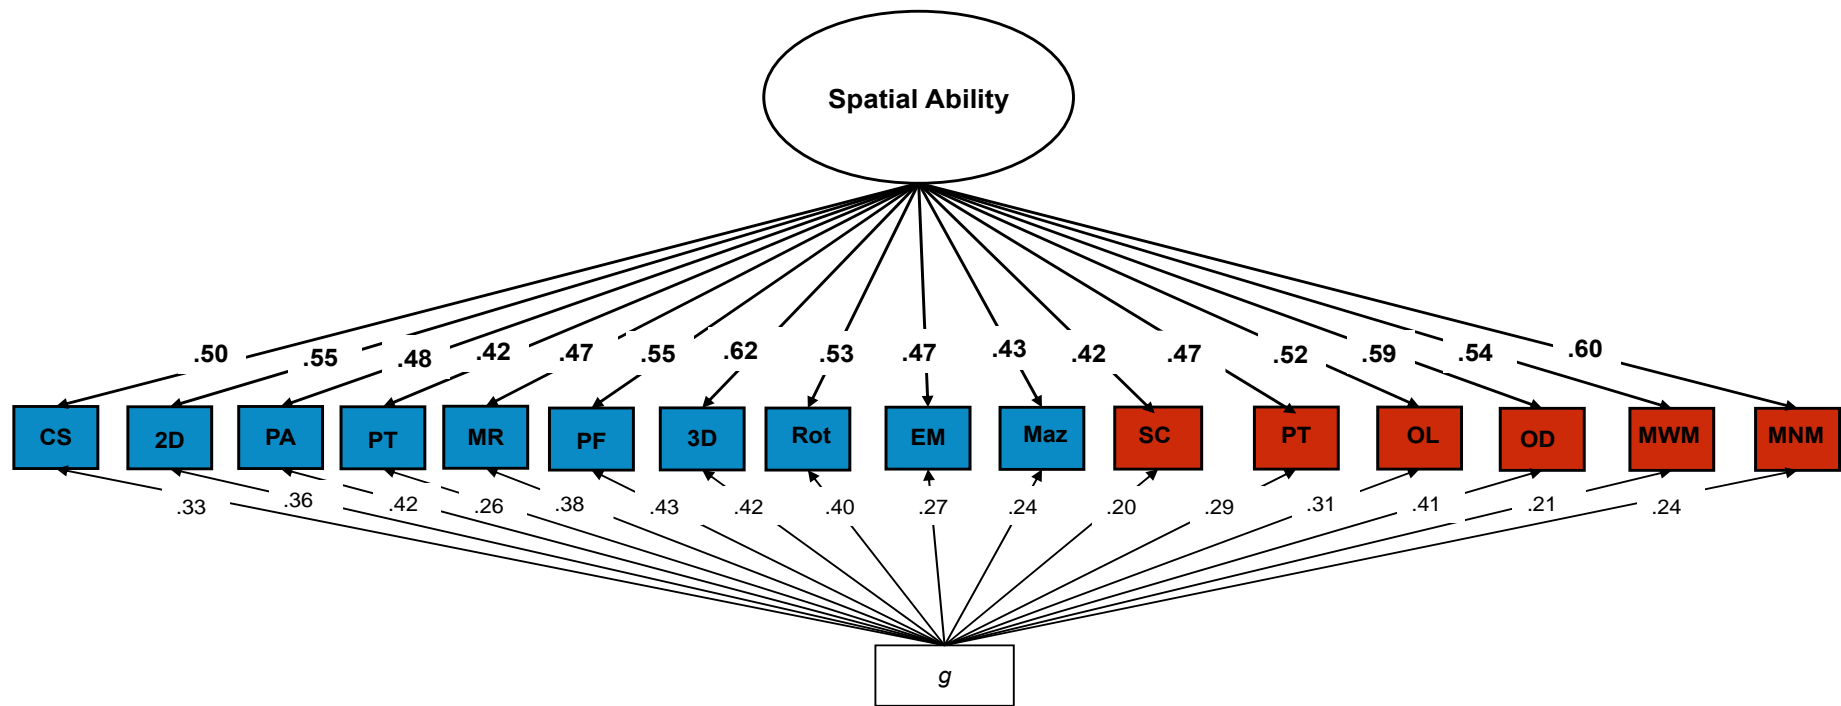

**Supplementary Figure 6.** One-factor model of spatial ability including the 16 spatial tests accounting for  $g$  at the level of the indicator (each test); see Table S5 for model fit indices. ND = navigation based on directions, NL = navigation based on landmarks, MR = map reading, RM = route memory, PT = perspective taking, SC = scanning, CS = cross-sections, 2d = 2d drawing, PA = pattern assembly, EM = Elithorn Mazes, MR = Mechanical Reasoning, PF = paper folding, 3d = 3d drawing, Rot = mental rotation, PT = perspective taking, Maz = mazes,  $g$  = general cognitive ability.

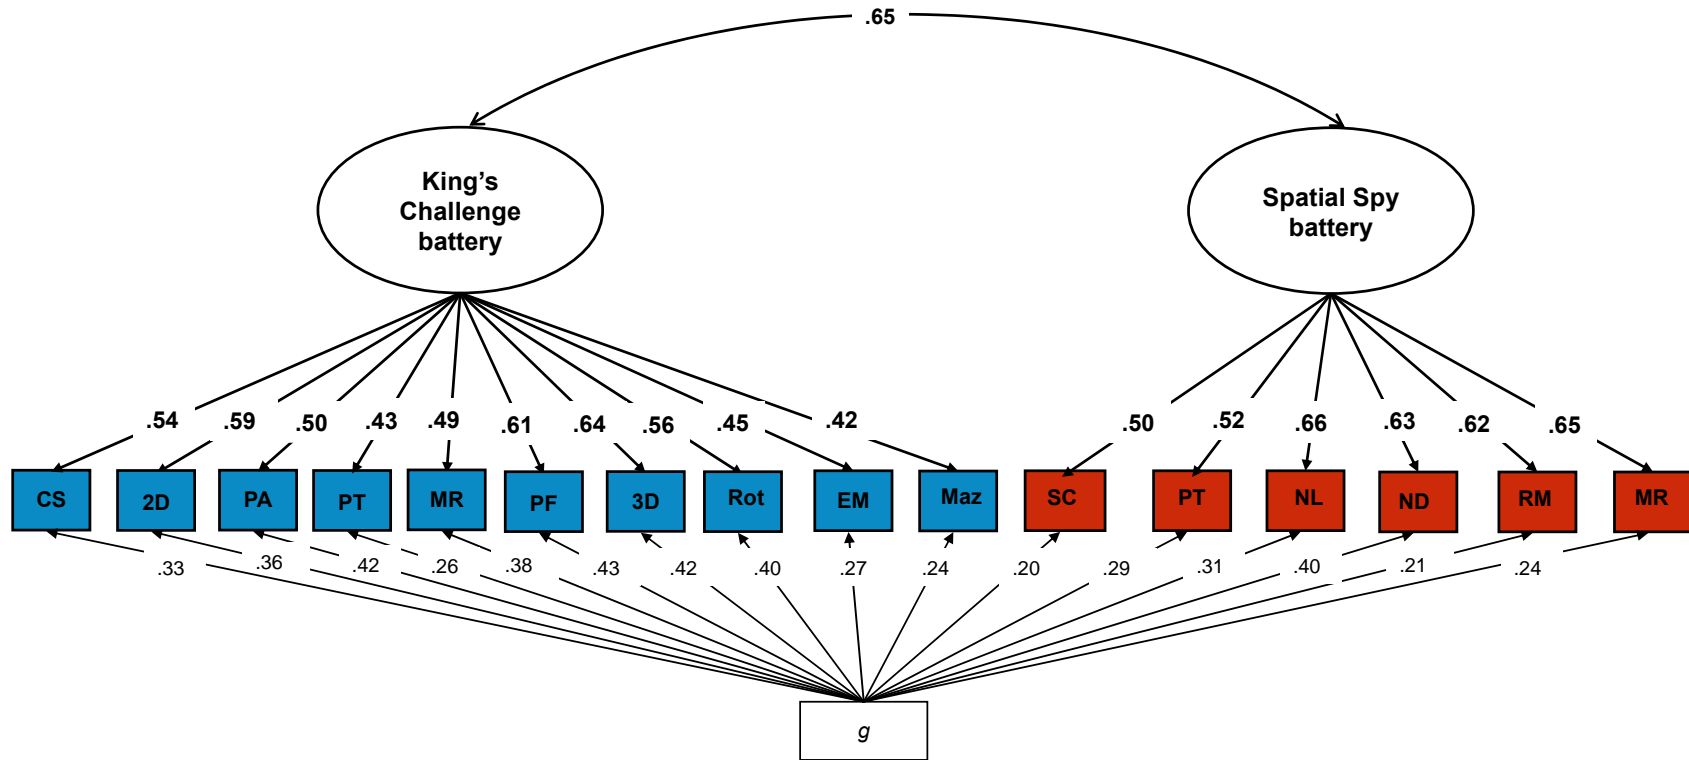

**Supplementary Figure 7.** Two-factor model of spatial ability separating the two batteries accounting for  $g$  at the level of the indicators (each test). Model fit indices are reported in Table S5. ND = navigation based on directions, NL = navigation based on landmarks, MR = map reading, RM = route memory, PT = perspective taking, SC = scanning, CS = cross-section, 2d = 2d drawing, PA = pattern assembly, EM = Elithorn Mazes, MR = Mechanical Reasoning, PF = paper folding, 3d = 3d drawing, Rot = mental rotation, PT = perspective taking, Maz = mazes,  $g$  = general cognitive ability.

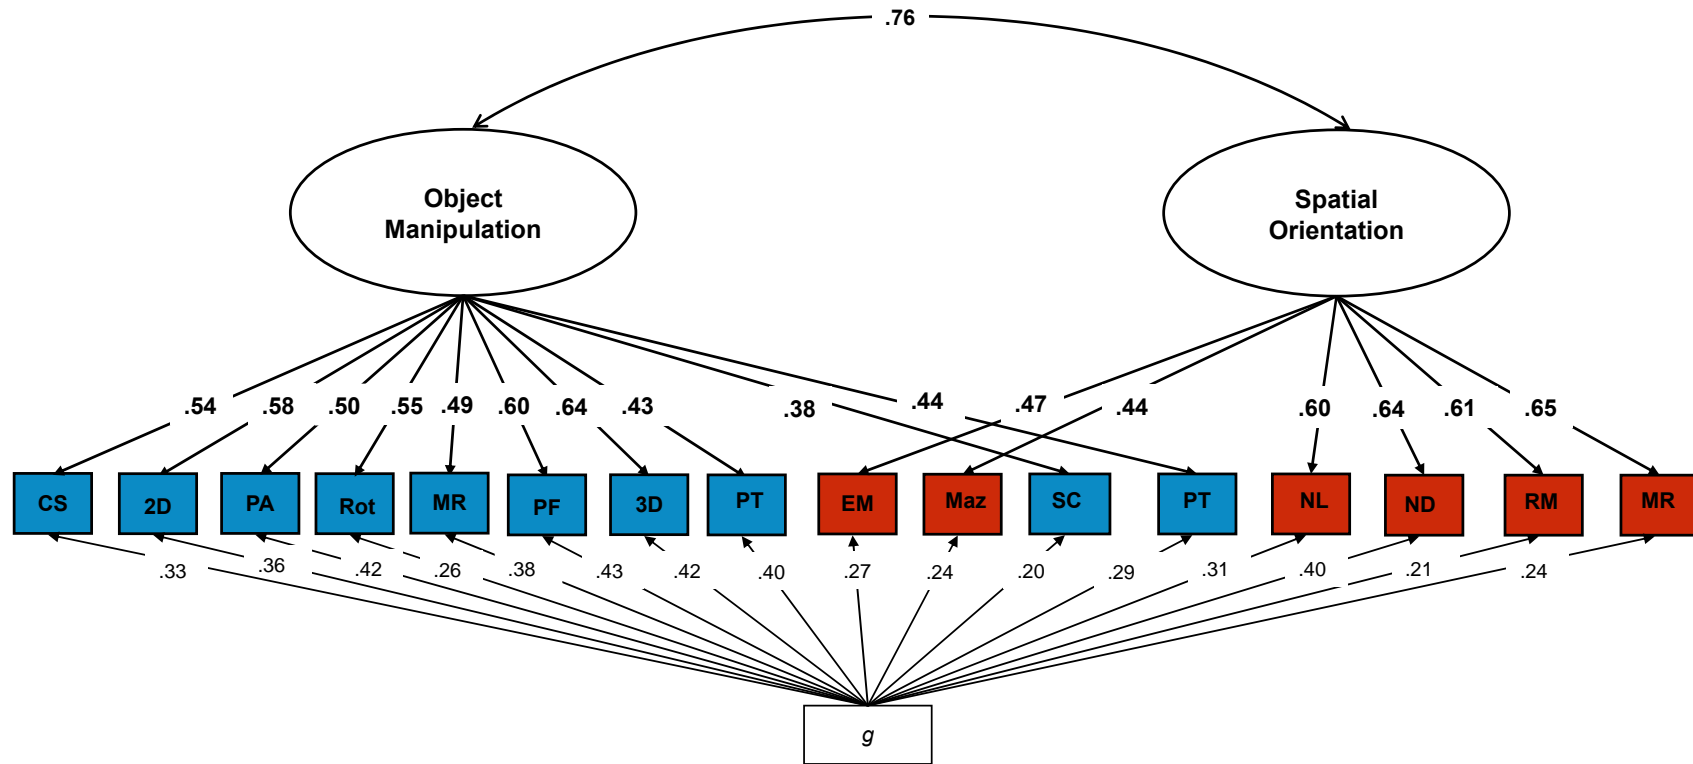

**Supplementary Figure 8.** Two-factor model of spatial ability separating objects-based and orienting tests combining putatively different aspects of spatial skills across the two batteries accounting for  $g$  at the level of the indicators (each test). Model fit indices are reported in Table S5. ND = navigation based on directions, NL = navigation based on landmarks, MR = map reading, RM = route memory, PT = perspective taking, SC = scanning, CS = cross-sections, 2d = 2d drawing, PA = pattern assembly, EM = Elithorn Mazes, MR = Mechanical Reasoning, PF = paper folding, 3d = 3d drawing, Rot = mental rotation, PT = perspective taking, Maz = mazes,  $g$  = general cognitive ability.

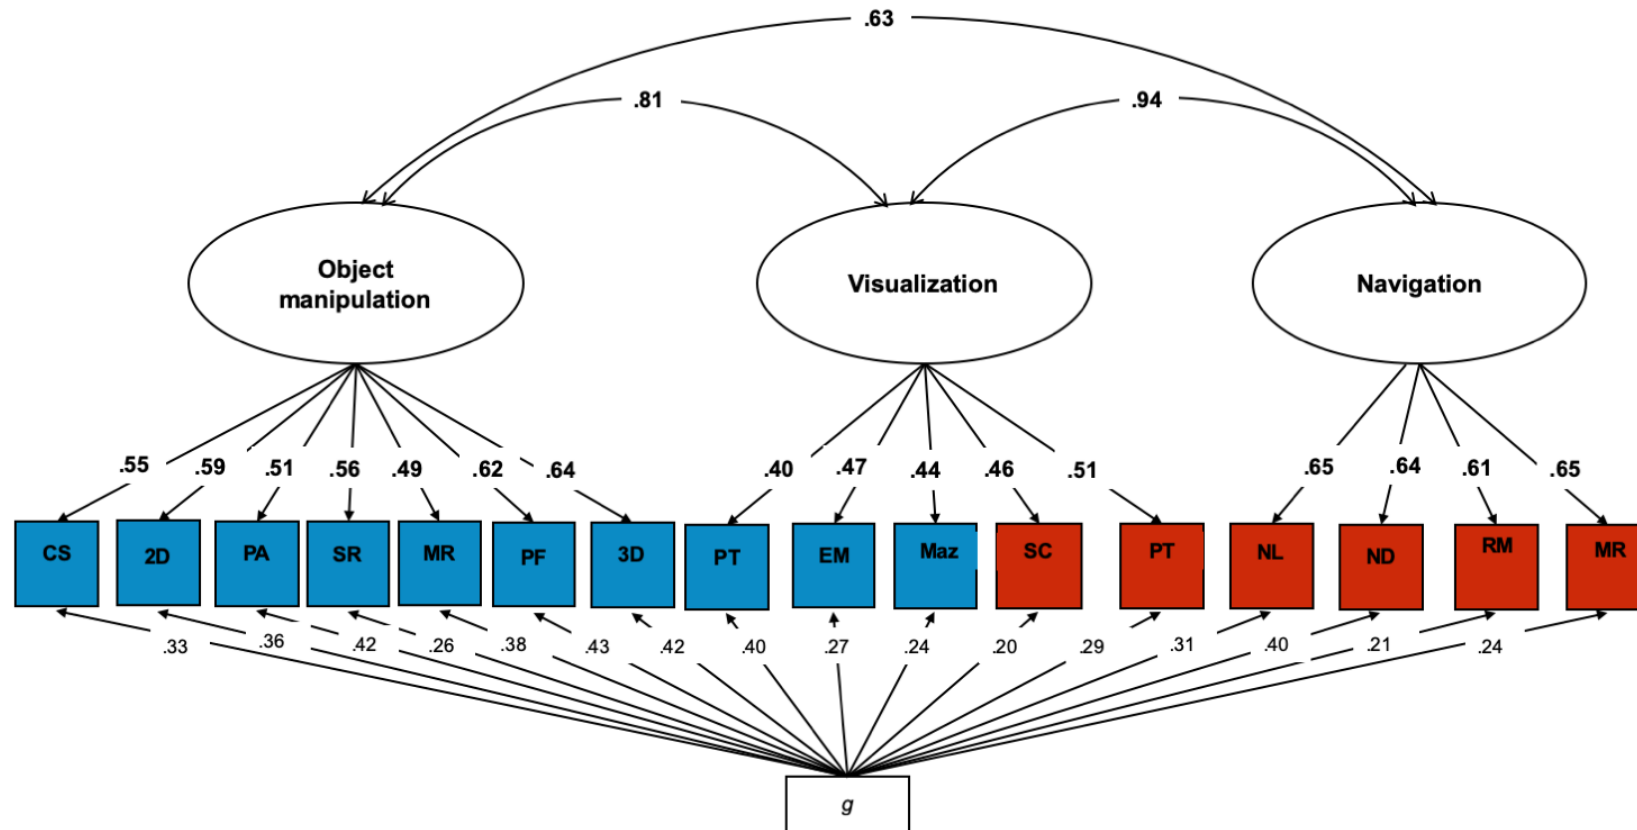

**Supplementary Figure 9.** Three-factor model of spatial ability separating objects-based, navigation and visualization tests across the two batteries accounting for  $g$ . Model fit indices are reported in Table S5. ND = navigation based on directions, NL = navigation based on landmarks, MR = map reading, RM = route memory, PT = perspective taking, SC = scanning, CS = cross-sections, 2d = 2d drawing, PA = pattern assembly, EM = Elithorn Mazes, MR = Mechanical Reasoning, PF = paper folding, 3d = 3d drawing, Rot = mental rotation, PT = perspective taking, Maz = mazes,  $g$  = general cognitive ability.



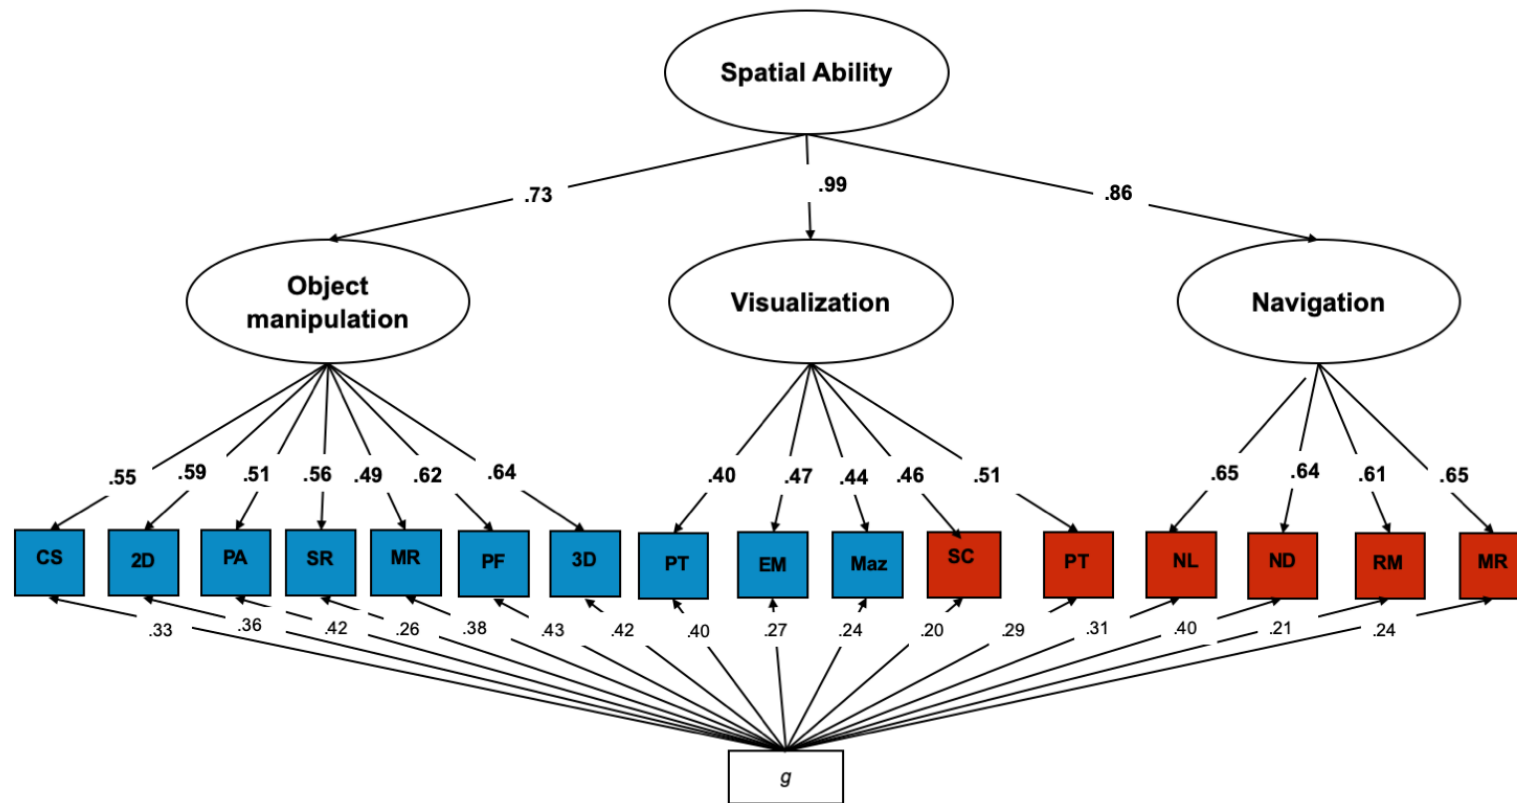

**Supplementary Figure 10.** Hierarchical model including three first-order spatial factors (Navigation, Object-based and Visualization) and a second-order common factor of Spatial ability, accounting for  $g$  at the level of the indicators (each test). Model fit indices are reported in Table S5. ND = navigation based on directions, NL = navigation based on landmarks, MR = map reading, RM = route memory, PT = perspective taking, SC = scanning, CS = cross-sections, 2d = 2d drawing, PA = pattern assembly, EM = Elithorn Mazes, MR = Mechanical Reasoning, PF = paper folding, 3d = 3d drawing, Rot = mental rotation, PT = perspective taking, Maz = mazes,  $g$  = general cognitive ability.

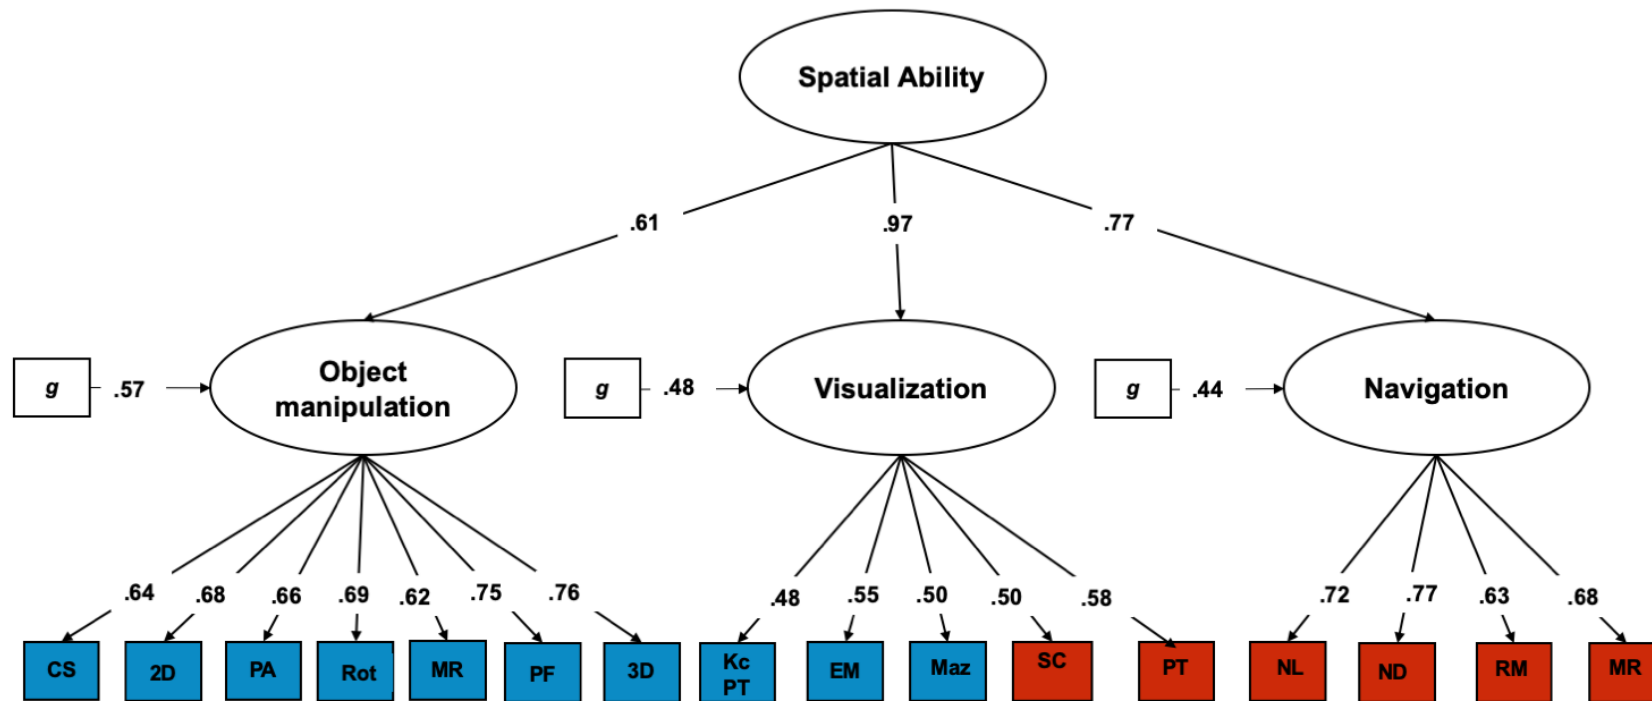

**Supplementary Figure 11.** Hierarchical model including three first-order spatial factors (Navigation, Object-based and Visualization) and a second-order common factor of Spatial ability, accounting for  $g$  at the level of the first-order factors. Model fit indices are reported in Table S5. ND = navigation based on directions, NL = navigation based on landmarks, MR = map reading, RM = route memory, PT = perspective taking, SC = scanning, CS = cross-sections, 2d = 2d drawing, PA = pattern assembly, EM = Elithorn Mazes, MR = Mechanical Reasoning, PF = paper folding, 3d = 3d drawing, Rot = mental rotation, PT = perspective taking, Maz = mazes,  $g$  = general cognitive ability.

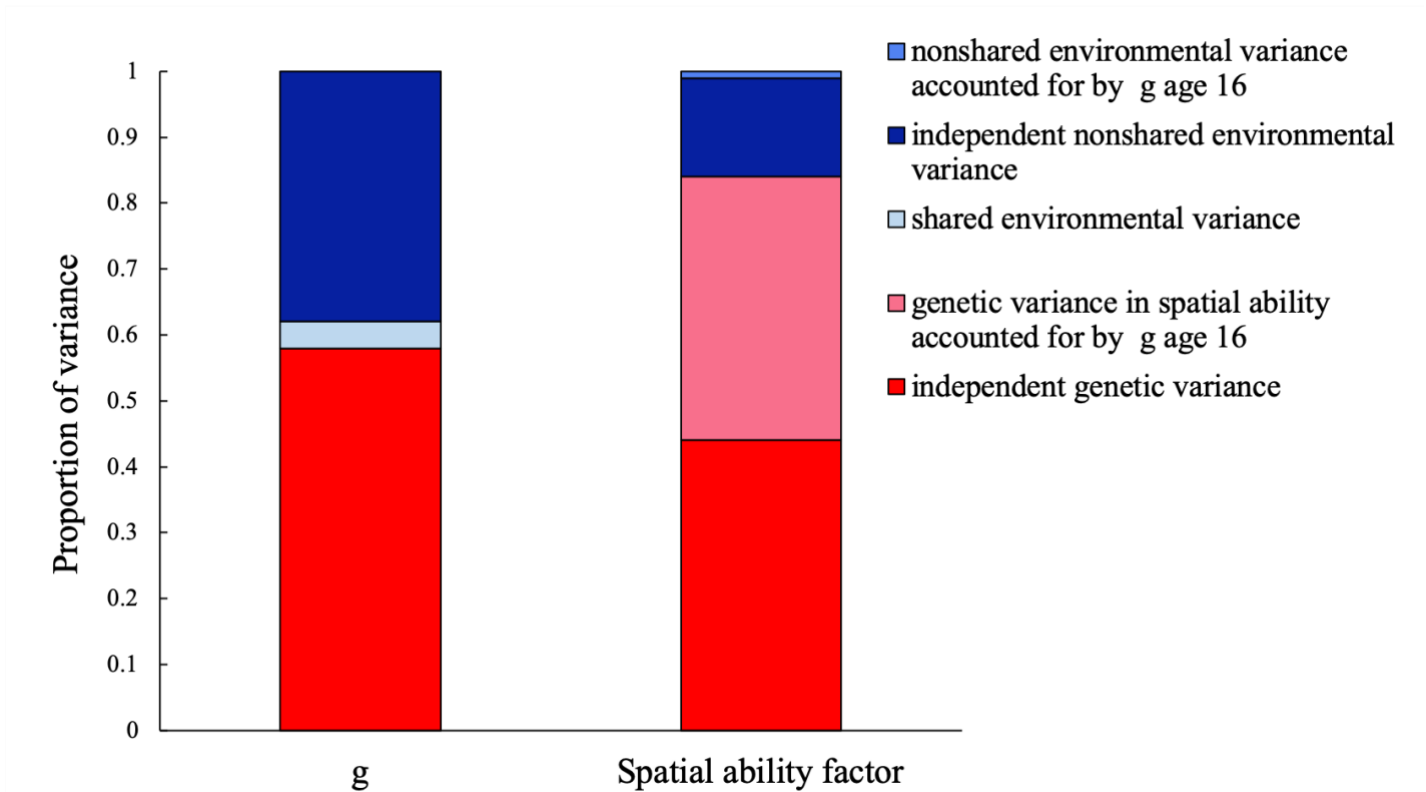

**Supplementary Figure 12.** Genetic and environmental variance in a measure of g at age 16 and in the common spatial ability factor. For the common spatial ability factor the bar is divided into the genetic and environmental contributions independent of g at age 16 and those that are accounted for by the genetic and environmental variance in g at age 16. Results are from a Cholesky decomposition. The measure of g at age 16 was calculated taking the mean of one verbal (Mill Hill Vocabulary) and one nonverbal (Raven's Progressive Matrices) test.

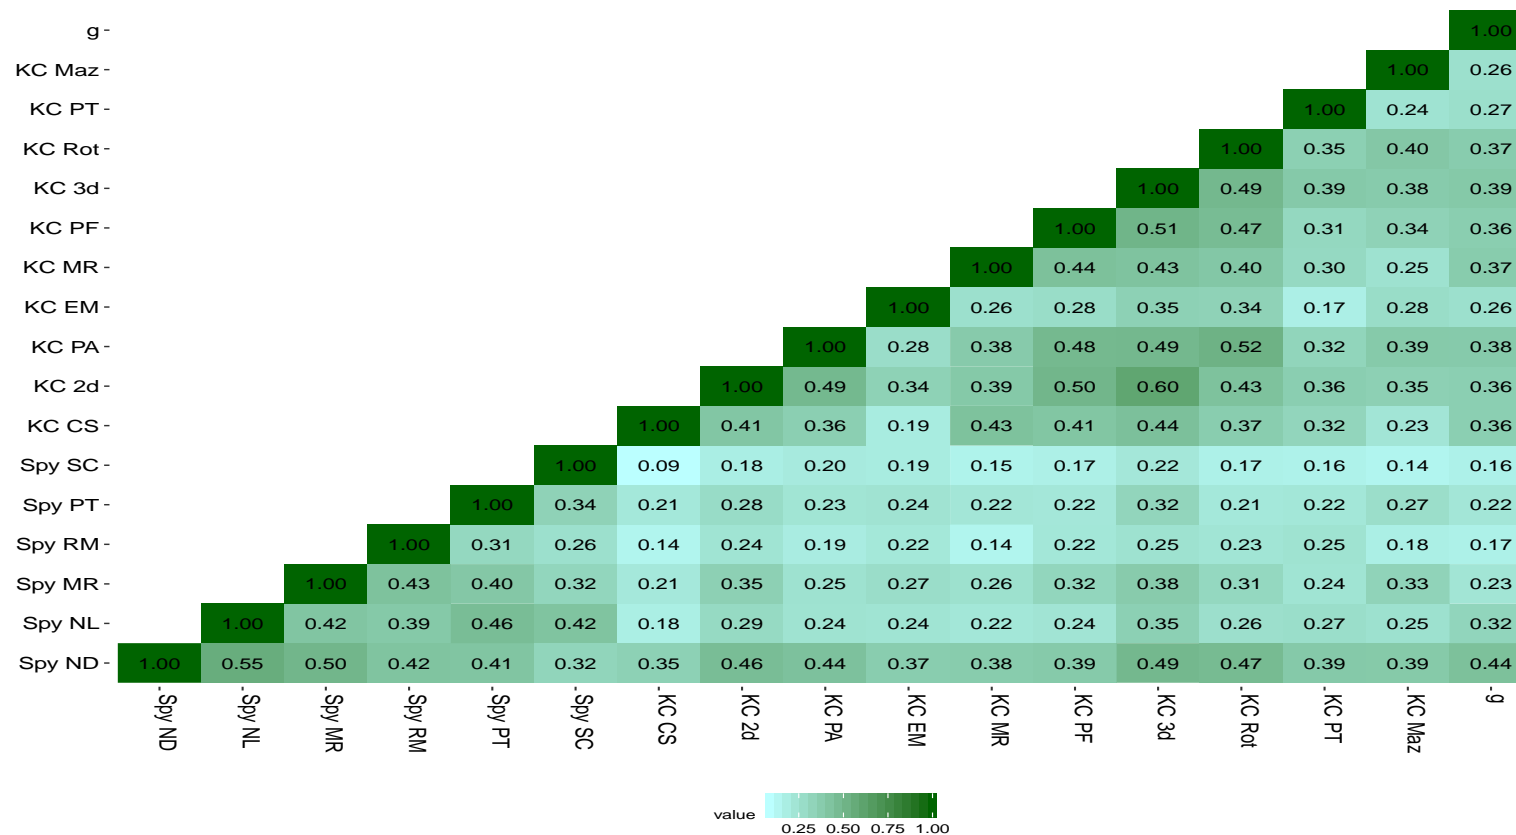

**Supplementary Figure 13.** Correlations between all spatial tests and general cognitive ability using data from the other half of the phenotypic sample. Spy = Spatial Spy battery (large-scale), KC = King’s Challenge battery (small-scale), ND = navigation based on directions, NL = navigation based on landmarks, MR = map reading, RM = route memory, PT = perspective taking, SC = scanning, CS = cross-sections, 2d = 2d drawing, PA = pattern assembly, EM = Elithorn Mazes, MR = Mechanical Reasoning, PF = paper folding, 3d = 3d drawing, Rot = mental rotation, PT = perspective taking, Maz = mazes, g = general cognitive ability. All correlations were significant at the  $p < .001$  level; variables were residualized for age and sex and standardized prior to analysis.

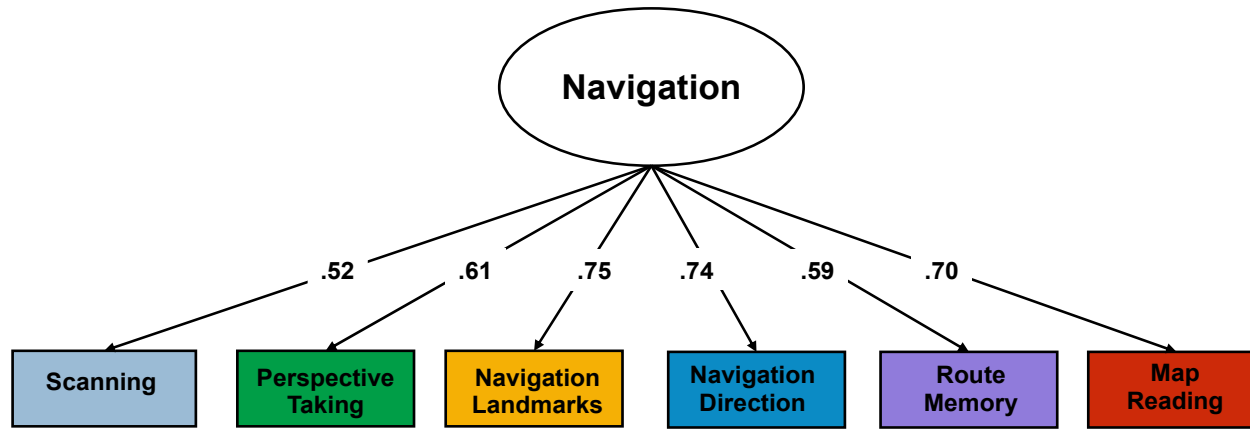

**Supplementary Figure 14.** Factor structure of navigation abilities conducted examining the other half of the sample; CFI = 0.968, TLI = 0.947, RMSEA = 0.073, SRMR = 0.027.

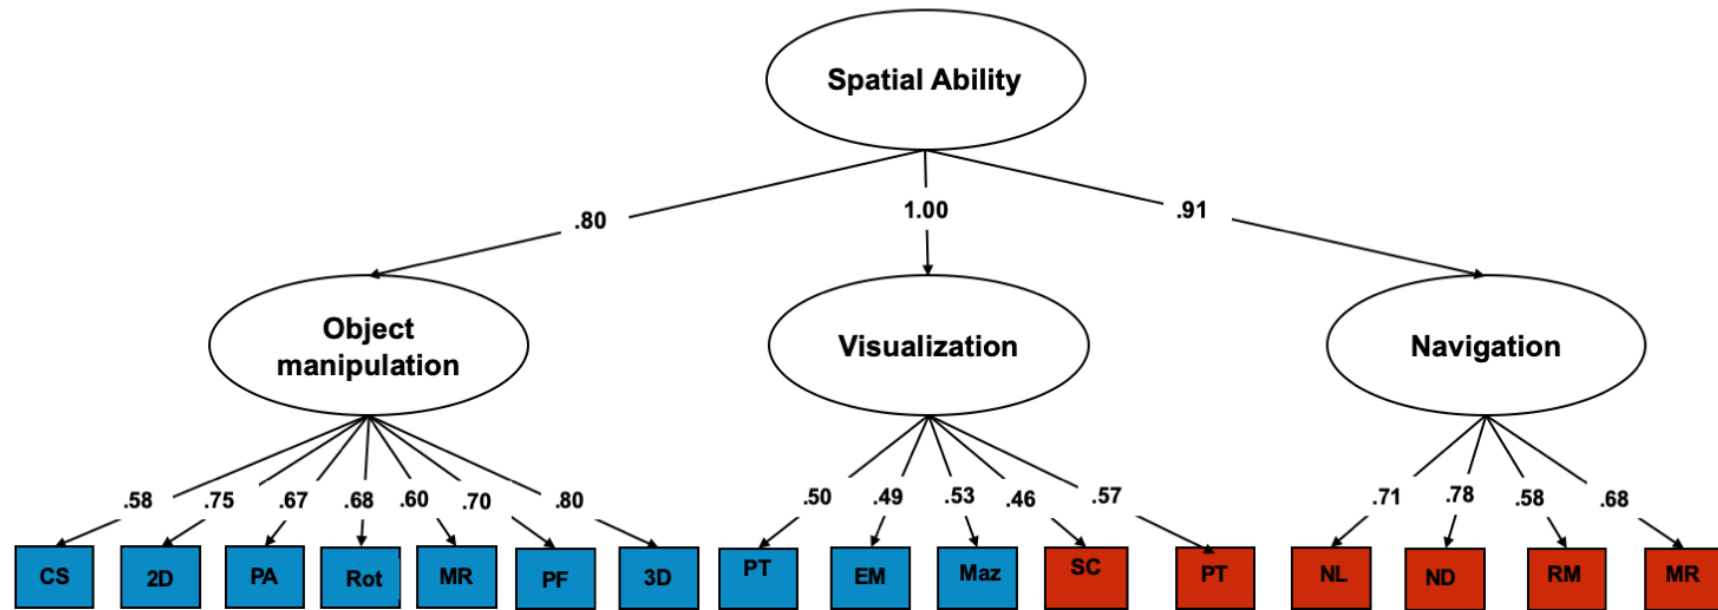

**Figure S15.** Hierarchical model of spatial abilities conducted in the other half of the sample; CFI = 0.939, TLI = 0.928, RMSEA = 0.046, SRMR = 0.050.
